# Supplementary material
Source: publisher figshare collection journal article supplement (https://sage.figshare.com/ndownloader/files/23255360)
Supplement: Supplementary file 1 [file 23255360]

Supplementary file  
**Attitude towards Youth Suicide (AtYS) Scale**

The following questions regard your opinions about youth suicide. Please, tick the answer closest to your opinion. Remember, there are no right or wrong answers.

|                                                                                                                                                             | Strongly agree           | Agree                    | Undecided                | Disagree                 | Strongly disagree        |
|-------------------------------------------------------------------------------------------------------------------------------------------------------------|--------------------------|--------------------------|--------------------------|--------------------------|--------------------------|
| It is always possible to help a young person with suicidal thought                                                                                          | <input type="checkbox"/> |
| Suicide can never be justified                                                                                                                              | <input type="checkbox"/> |
| Suicide is among the worst thing to do to one's family                                                                                                      | <input type="checkbox"/> |
| Once a young person has decided to suicide, no one can stop him/her                                                                                         | <input type="checkbox"/> |
| People do have the right to suicide                                                                                                                         | <input type="checkbox"/> |
| Youth who make suicidal threats seldom kill themselves                                                                                                      | <input type="checkbox"/> |
| Suicide is a subject that one should not talk about                                                                                                         | <input type="checkbox"/> |
| Almost everyone has at one time or another thought about killing him/herself                                                                                | <input type="checkbox"/> |
| There may be situations where the only reasonable thing to do is suicide                                                                                    | <input type="checkbox"/> |
| Suicide occurs without warning signs                                                                                                                        | <input type="checkbox"/> |
| Most people avoid talking about suicide                                                                                                                     | <input type="checkbox"/> |
| If someone wants to suicide, it is their business and we should not interfere                                                                               | <input type="checkbox"/> |
| A youth suffering from a severe, incurable disease expressing wish to die should be helped to do it                                                         | <input type="checkbox"/> |
| Youth who talk about suicide do not suicide                                                                                                                 | <input type="checkbox"/> |
| When a young person suicides it is something he/she has considered for a long time                                                                          | <input type="checkbox"/> |
| Youth suicide can be prevented                                                                                                                              | <input type="checkbox"/> |
| I would feel ashamed if a member of my family suicided                                                                                                      | <input type="checkbox"/> |
| Potentially, every one of us can be a suicide victim                                                                                                        | <input type="checkbox"/> |
| In general, suicide is an act not to be forgiven                                                                                                            | <input type="checkbox"/> |
| Heroic suicide (e.g., the soldier in war throwing himself on a live grenade) should be viewed differently from other suicides (e.g., jumping off a bridge). | <input type="checkbox"/> |
| Youth do have the right to suicide                                                                                                                          | <input type="checkbox"/> |
